# Supplementary material
Source: PubMed Central journal article supplement (PMC3127881)
Supplement: 1104989108_pnas.1104989108_SI.pdf [file 1104989108_pnas.1104989108_SI.pdf]

# Supporting Information

Nagel et al. 10.1073/pnas.1104989108

## SI Text

**Analyses in the Case of More than Two Conformational States. Case I:** Here, we consider a case of conformational sampling in which the enzyme must go through multiple inactive conformational states  $A$  and  $B$  to reach the active state  $C$ :

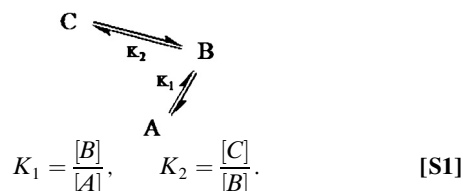

We obtain an expression for the fraction of enzyme in the active conformer ( $C$ ) as follows in Eqs. S2–S6:

$$\frac{[C]}{[A]} = K_1 K_2 = \frac{[C]}{E_{\text{TOT}} - [B] - [C]}, \quad [\text{S2}]$$

$$\frac{1}{K_1 K_2} = \frac{E_{\text{TOT}} - [B] - [C]}{[C]} = \frac{E_{\text{TOT}}}{[C]} - \frac{1}{K_2} - 1, \quad [\text{S3}]$$

$$\frac{[C]}{E_{\text{TOT}}} = \frac{1}{\frac{1}{K_1 K_2} + \frac{1}{K_2} + 1} = \frac{K_1 K_2}{1 + K_1 + K_1 K_2}, \quad [\text{S4}]$$

$$k_{\text{obs}} = \frac{K_1 K_2}{1 + K_1 + K_1 K_2} \times A_{\text{int}} e^{-E_a/RT}. \quad [\text{S5}]$$

When  $K_1$  and  $K_1 K_2 \ll 1$ , at low temperature, we obtain Eqs. S6–S8:

$$\ln(k_{\text{obs}}) = \ln(K_1 K_2) + \ln(A_{\text{int}}) - \frac{E_a(\text{int})}{RT}, \quad [\text{S6}]$$

$$\ln(k_{\text{obs}}) = \ln(A_{\text{int}}) + \frac{\Delta S_{c,1}^{\circ} + \Delta S_{c,2}^{\circ}}{R} - \frac{E_a(\text{int}) + \Delta H_{c,1}^{\circ} + \Delta H_{c,2}^{\circ}}{RT}, \quad [\text{S7}]$$

$$\ln(A_{\text{obs}}) = \ln(A_{\text{int}}) + \frac{\Delta S_{c,1}^{\circ} + \Delta S_{c,2}^{\circ}}{R}. \quad [\text{S8}]$$

**Case II:** For the case of two (or more) active conformers  $B$  and  $C$  that are in equilibrium with an inactive conformer  $A$ , we have:

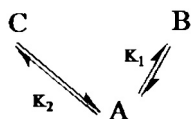

With

$$K_1 = \frac{[B]}{[A]}, \quad K_2 = \frac{[C]}{[A]}. \quad [\text{S9}]$$

For the simplest case, where  $C$  and  $B$  have the same rate constant, we can solve the problem in terms of their joint concentration.

We first set up a virtual species  $[X] = [B] + [C]$ , with  $K_x = [X]/[A]$ , and rearrange as follows:

$$[X] = (E_{\text{TOT}} - [X])K_x, \quad [\text{S10}]$$

$$[X](1 + K_x) = E_{\text{TOT}}K_x, \quad [\text{S11}]$$

$$\frac{[X]}{E_{\text{TOT}}} = \frac{K_x}{1 + K_x}. \quad [\text{S12}]$$

Because  $[X] = [B] + [C]$ ,  $K_x = [B]/[A] + [C]/[A]$ , so

$$\frac{[X]}{E_{\text{TOT}}} = f_{\text{active}} = \frac{K_1 + K_2}{1 + K_1 + K_2}, \quad [\text{S13}]$$

$$k_{\text{obs}} = \frac{K_1 + K_2}{1 + K_1 + K_2} \times A_{\text{int}} e^{-E_a(\text{int})/RT}, \quad [\text{S14}]$$

and the logarithmic form is now

$$\ln(k_{\text{obs}}) = \ln(K_1 + K_2) - \ln(1 + K_1 + K_2) + \ln(A_{\text{int}}) - \frac{E_a(\text{int})}{RT}. \quad [\text{S15}]$$

At low temperature,  $K_1$  and  $K_2$  are small, and the term  $\ln(1 + K_1 + K_2)$  drops out. Although the form of  $\ln(K_1 + K_2)$  is not obvious, we can consider limiting cases. In one case, we may have  $K_1$  and  $K_2$  that are essentially identical, so that the first term becomes  $\ln(2K_1) = \ln(2) + \ln(K_1)$ . Similar to the case for a single conformer, now

$$\ln(k_{\text{obs}}) = \ln(2) + \ln(A_{\text{int}}) + \frac{\Delta S_{c,1}^{\circ}}{R} - \frac{E_a(\text{int}) + \Delta H_{c,1}^{\circ}}{RT}. \quad [\text{S16}]$$

In this way, it can be seen that for multiple active conformers, there is an additional contribution to the Arrhenius prefactor:

$$\ln(A_{\text{obs}}) = \ln(2) + \ln(A_{\text{int}}) + \frac{\Delta S_{c,1}^{\circ}}{R}. \quad [\text{S17}]$$

And generally, for  $n$  identical active conformers, we have

$$\ln(A_{\text{obs}}) = \ln(n) + \ln(A_{\text{int}}) + \frac{\Delta S_c^{\circ}}{R}. \quad [\text{S18}]$$

Likewise, in the opposite extreme, if one active conformer is much more energetically favorable than the other (e.g.,  $K_1 \gg K_2$ ), then the lower energy conformer dominates, and the problem simplifies to *Case I* above.

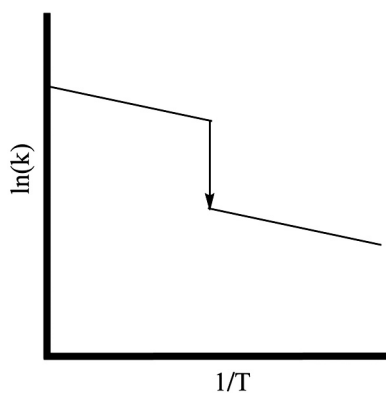

Fig. S1. An Arrhenius plot representing a hypothetical conformational change that leads to an irreversible loss of the active form of enzyme below the temperature break.

Table S1. Kinetic parameters for ht-ADH variants

| Temperature, °C | $k_{cat}$ , $s^{-1}$ | Error | Temperature, °C | $k_{cat}$ , $s^{-1}$ | Error |
|-----------------|----------------------|-------|-----------------|----------------------|-------|
| L176V           |                      |       | L176Δ           |                      |       |
| 12.5            | 0.12                 | 0.01  | 10              | 0.007                | 0.001 |
| 16              | 0.25                 | 0.02  | 15              | 0.017                | 0.004 |
| 20              | 0.48                 | 0.03  | 20              | 0.065                | 0.026 |
| 24              | 0.89                 | 0.08  | 30              | 0.43                 | 0.10  |
| 28.5            | 1.7                  | 0.1   | 40              | 0.91                 | 0.17  |
| 33              | 2.4                  | 0.2   | 50              | 1.8                  | 0.3   |
| 37.5            | 4.1                  | 0.3   | 60              | 3.1                  | 1.0   |
| 42              | 6.0                  | 0.6   |                 |                      |       |
| 45              | 8.9                  | 0.7   |                 |                      |       |
| 52              | 14.6                 | 1.3   |                 |                      |       |
| L176A           |                      |       | V260A           |                      |       |
| 5               | 0.07                 | 0.01  | 10              | 0.044                | 0.004 |
| 12.5            | 0.26                 | 0.05  | 15              | 0.128                | 0.010 |
| 20              | 0.81                 | 0.07  | 20              | 0.41                 | 0.02  |
| 28.5            | 2.9                  | 0.3   | 30              | 2.4                  | 0.2   |
| 33              | 4.2                  | 0.4   | 37.5            | 7.5                  | 0.8   |
| 37.5            | 6.6                  | 0.7   | 45              | 14.2                 | 0.7   |
| 45              | 11.9                 | 1.7   | 50              | 18.1                 | 2.2   |
| 52              | 19.1                 | 2.5   | 58              | 32.8                 | 3.0   |
| L176G           |                      |       |                 |                      |       |
| 10              | 0.32                 | 0.04  |                 |                      |       |
| 16              | 0.97                 | 0.12  |                 |                      |       |
| 20              | 1.8                  | 0.3   |                 |                      |       |
| 30              | 7.7                  | 1.4   |                 |                      |       |
| 37.5            | 15.2                 | 3.6   |                 |                      |       |
| 46              | 29.4                 | 3.5   |                 |                      |       |
| 52              | 51.0                 | 8.2   |                 |                      |       |
